# Supplementary material for: The LORS-Enabled Dialogue: A Collaborative Intervention to Promote Recovery From Psychotic Disorders
Source: Atypon-hosted journal article supplement (doi:10.1176/appi.ps.201100421), 2013-01-01

NAME: \_\_\_\_\_

# Levels of Recovery from Psychotic Disorders

DATE: \_\_\_\_\_

| 13 ITEMS ✓                          |  | ACTIVE ILLNESS<br>(DANGER TO SELF & OTHERS)                                                                                                                                                                                                                                                                        | ACTIVE ILLNESS<br>(CONTROLLED PSYCHOSIS)                                                                                                                                                                                                                                                                                 | STABLE BUT NOT<br>IMPROVING                                                                                                                                                                                                                                                                                               | STABLE &<br>IMPROVING                                                                                                                                                                                                                                                                                                                      | NORMALIZED<br>ACTIVITY                                                                                                                                                                                                                                |
|-------------------------------------|--|--------------------------------------------------------------------------------------------------------------------------------------------------------------------------------------------------------------------------------------------------------------------------------------------------------------------|--------------------------------------------------------------------------------------------------------------------------------------------------------------------------------------------------------------------------------------------------------------------------------------------------------------------------|---------------------------------------------------------------------------------------------------------------------------------------------------------------------------------------------------------------------------------------------------------------------------------------------------------------------------|--------------------------------------------------------------------------------------------------------------------------------------------------------------------------------------------------------------------------------------------------------------------------------------------------------------------------------------------|-------------------------------------------------------------------------------------------------------------------------------------------------------------------------------------------------------------------------------------------------------|
| <b>SUPERVISION</b>                  |  | <u>HOSPITAL WARD</u><br>▶ locked ward<br>▶ 24 hour nursing care                                                                                                                                                                                                                                                    | <u>CUSTODIAL WARD</u><br>▶ unlocked ward<br>▶ day hospital<br>▶ partial hospital                                                                                                                                                                                                                                         | <u>COMMUNITY RESIDENCE STAFFED</u><br>▶ rehabilitation house<br>▶ 3/4, 1/2, 1/4 house                                                                                                                                                                                                                                     | <u>STAFFED SUPPORTED APARTMENT</u><br>▶ includes other's home                                                                                                                                                                                                                                                                              | <u>INDEPENDENT LIVING</u><br>▶ independent home<br>▶ flexible support from staff                                                                                                                                                                      |
| <b>POSITIVE SYMPTOMS OF ILLNESS</b> |  | <u>POTENTIAL FOR VIOLENCE</u><br>▶ very high risk<br><u>VOICES</u><br>▶ present most of the time, occasional command hallucinations<br><u>THINKING</u><br>▶ bizarre, unpleasant<br><u>REALITY TESTING</u><br>▶ poor<br><u>KNOWLEDGE REGARDING ILLNESS &amp; ADHERENCE TO TREATMENT</u><br>▶ poor & complete denial | <u>POTENTIAL FOR VIOLENCE</u><br>▶ high risk<br><u>VOICES</u><br>▶ present much of the time, significantly affect functioning<br><u>THINKING</u><br>▶ less bizarre, unpleasant<br><u>REALITY TESTING</u><br>▶ fair<br><u>KNOWLEDGE REGARDING ILLNESS &amp; ADHERENCE TO TREATMENT</u><br>▶ poor & questionable adherence | <u>POTENTIAL FOR VIOLENCE</u><br>▶ moderate risk<br><u>VOICES</u><br>▶ present much of the time, sometimes able to ignore<br><u>THINKING</u><br>▶ more organized, unpleasant<br><u>REALITY TESTING</u><br>▶ more reality based<br><u>KNOWLEDGE REGARDING ILLNESS &amp; ADHERENCE TO TREATMENT</u><br>▶ fair - some denial | <u>POTENTIAL FOR VIOLENCE</u><br>▶ minor risk<br><u>VOICES</u><br>▶ less intrusive, viewed as part of illness<br><u>THINKING</u><br>▶ goal directed, pleasant, occasional problems<br><u>REALITY TESTING</u><br>▶ reality based most of time<br><u>KNOWLEDGE REGARDING ILLNESS &amp; ADHERENCE TO TREATMENT</u><br>▶ fair - minimal denial | <u>POTENTIAL FOR VIOLENCE</u><br>▶ very insignificant<br><u>VOICES</u><br>▶ none or minimal<br><u>THINKING</u><br>▶ clear, organized<br><u>REALITY TESTING</u><br>▶ good<br><u>KNOWLEDGE REGARDING ILLNESS &amp; ADHERENCE TO TREATMENT</u><br>▶ good |
| <b>NEGATIVE SYMPTOMS OF ILLNESS</b> |  | <u>FACIAL EXPRESSION</u><br>▶ very distressed, anxious or flat<br><u>SPEECH</u><br>▶ monotonous voice<br><u>INTEREST IN OTHERS</u><br>▶ avoids close relationships                                                                                                                                                 | <u>FACIAL EXPRESSION</u><br>▶ somewhat distressed, anxious or flat<br><u>SPEECH</u><br>▶ initiates some conversation<br><u>INTEREST IN OTHERS</u><br>▶ does not initiate relationships                                                                                                                                   | <u>FACIAL EXPRESSION</u><br>▶ less distressed, anxious<br><u>SPEECH</u><br>▶ better tone, volume<br><u>INTEREST IN OTHERS</u><br>▶ shows interest in others                                                                                                                                                               | <u>FACIAL EXPRESSION</u><br>▶ demonstrates spontaneous humor<br><u>SPEECH</u><br>▶ give-and-take dialogue<br><u>INTEREST IN OTHERS</u><br>▶ cooperates with others                                                                                                                                                                         | <u>FACIAL EXPRESSION</u><br>▶ adequate range of expression<br><u>SPEECH</u><br>▶ good conversations<br><u>INTEREST IN OTHERS</u><br>▶ enjoys relationships with others                                                                                |
| <b>WORK &amp; EDUCATION</b>         |  | <u>VOLUNTEER OR WORK</u><br>▶ very limited<br>▶ concentration for tasks poor<br>▶ housekeeping room minimal                                                                                                                                                                                                        | <u>VOLUNTEER OR WORK</u><br>▶ more time with tasks<br>▶ improved concentration<br>▶ housekeeping own area                                                                                                                                                                                                                | <u>VOLUNTEER OR WORK</u><br>▶ day treatment program<br>▶ psychosocial rehab program<br>▶ sheltered employment                                                                                                                                                                                                             | <u>VOLUNTEER OR WORK</u><br>▶ TEP (1/2 time/clubhouse)<br>▶ supported education<br>▶ job training                                                                                                                                                                                                                                          | <u>VOLUNTEER OR WORK</u><br>▶ independent employment P/T or F/T<br>▶ independent education<br>▶ independent volunteer                                                                                                                                 |
| <b>SOCIAL SKILLS</b>                |  | <u>PERSONAL HYGIENE CARE</u><br>▶ poor<br><u>SOCIAL INTERACTION SKILLS</u><br>▶ very poor                                                                                                                                                                                                                          | <u>PERSONAL HYGIENE CARE</u><br>▶ grooming, hygiene requires staff encouragement<br><u>SOCIAL INTERACTION SKILLS</u><br>▶ eye contact, body language poor                                                                                                                                                                | <u>PERSONAL HYGIENE CARE</u><br>▶ limited interest in grooming<br><u>SOCIAL INTERACTION SKILLS</u><br>▶ improved eye contact, smiling, better non-verbal communication                                                                                                                                                    | <u>PERSONAL HYGIENE CARE</u><br>▶ adequate attention to grooming<br><u>SOCIAL INTERACTION SKILLS</u><br>▶ good                                                                                                                                                                                                                             | <u>PERSONAL HYGIENE CARE</u><br>▶ enjoys good personal presentation<br><u>SOCIAL INTERACTION SKILLS</u><br>▶ involved in normal social interaction                                                                                                    |
| <b>ADVOCACY</b>                     |  | <u>INITIATES SELF ADVOCACY</u><br>▶ no self advocacy for needs<br>▶ no future orientation to goals                                                                                                                                                                                                                 | <u>INITIATES SELF ADVOCACY</u><br>▶ limited self advocacy<br>▶ limited future orientation to goals                                                                                                                                                                                                                       | <u>INITIATES SELF ADVOCACY</u><br>▶ increasingly voicing own desires<br>▶ more future goal orientation                                                                                                                                                                                                                    | <u>INITIATES SELF ADVOCACY</u><br>▶ improved sense of self<br>▶ goals present & future focused                                                                                                                                                                                                                                             | <u>INITIATES SELF ADVOCACY</u><br>▶ plans and executes long term goals                                                                                                                                                                                |

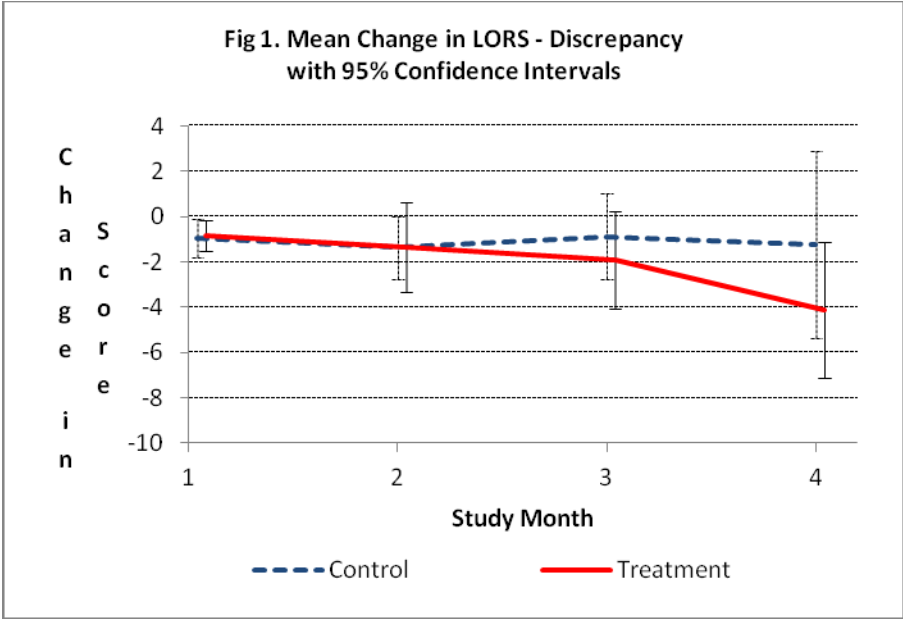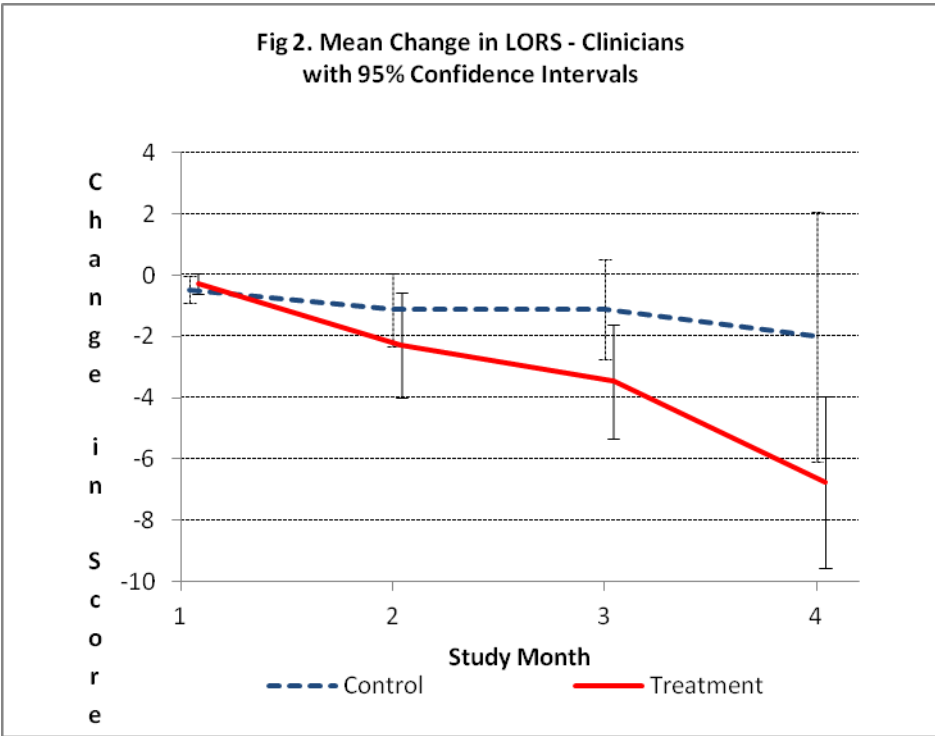

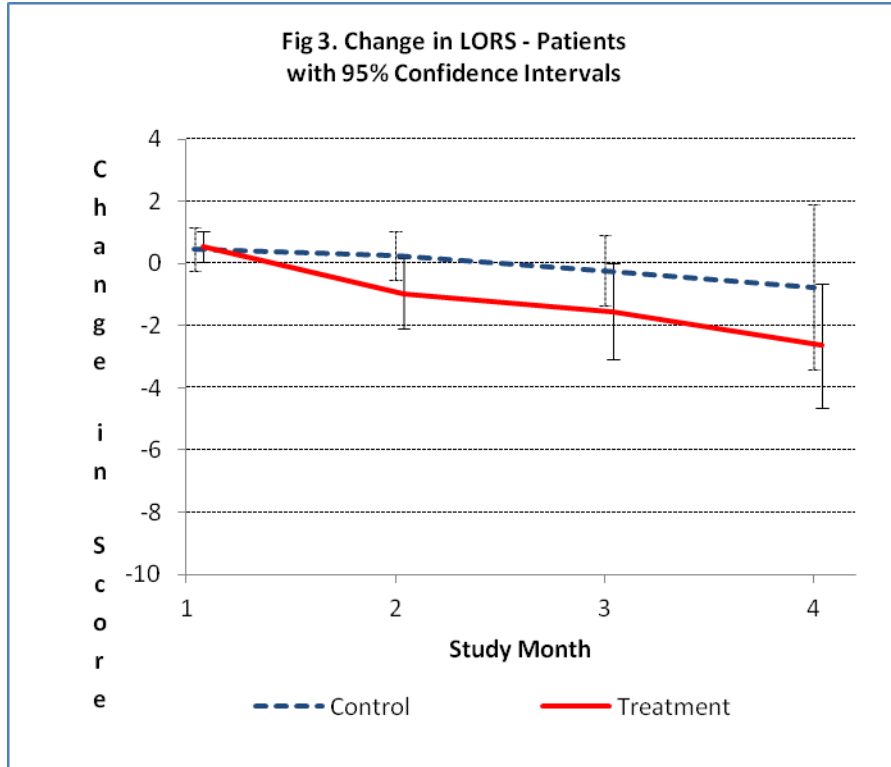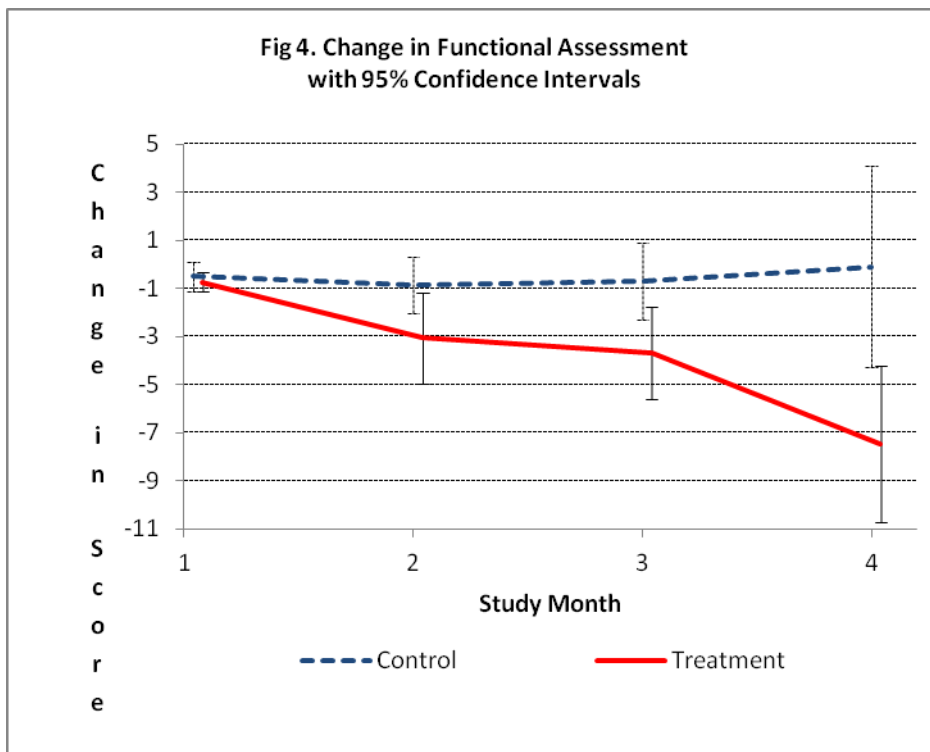

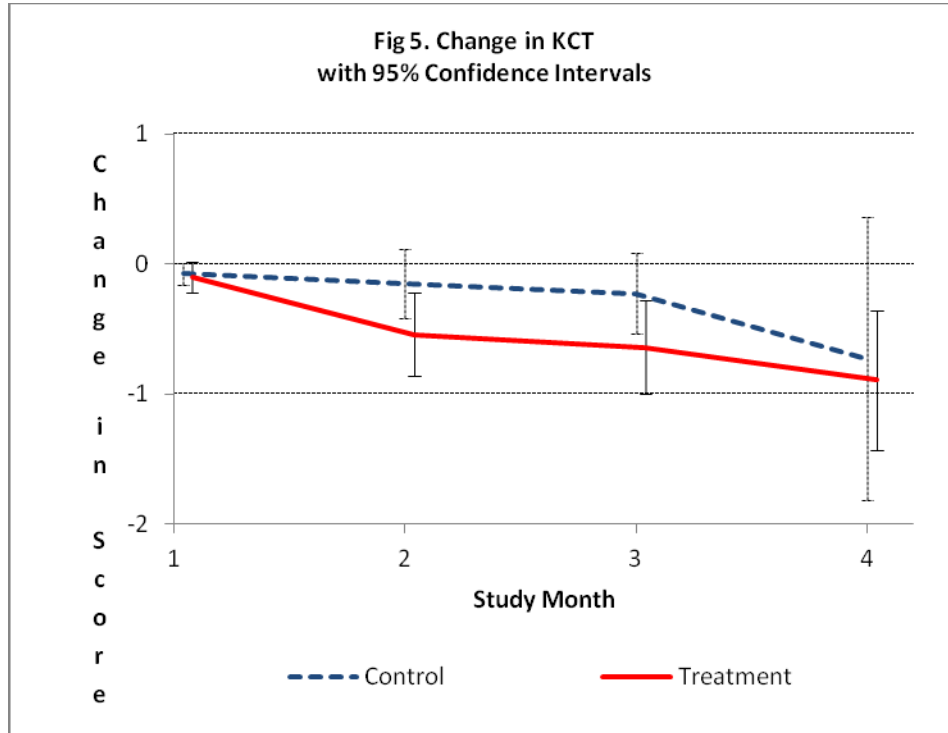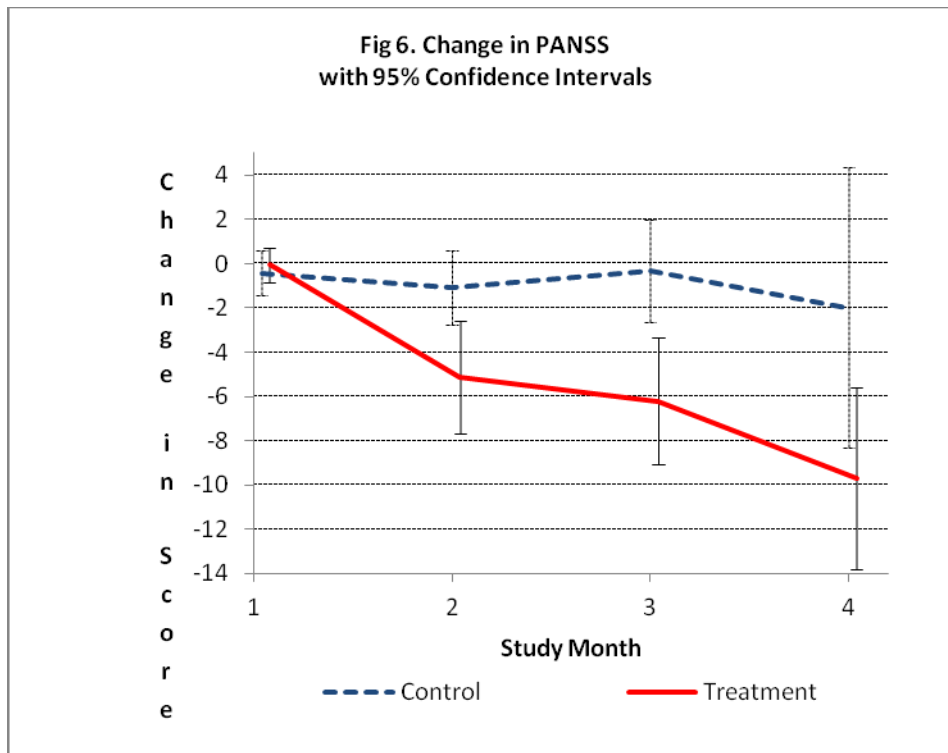

Supplement: 58_ds001.pdf [file 58_ds001.pdf]
